# Supplementary material for: Seascape Ethnomapping on the Inner Continental Shelf of the Brazilian Semiarid Coast
Source: MDPI journal article supplement (doi:10.3390/w15040798), 2023-02-17
Supplement: s1 [file s1]

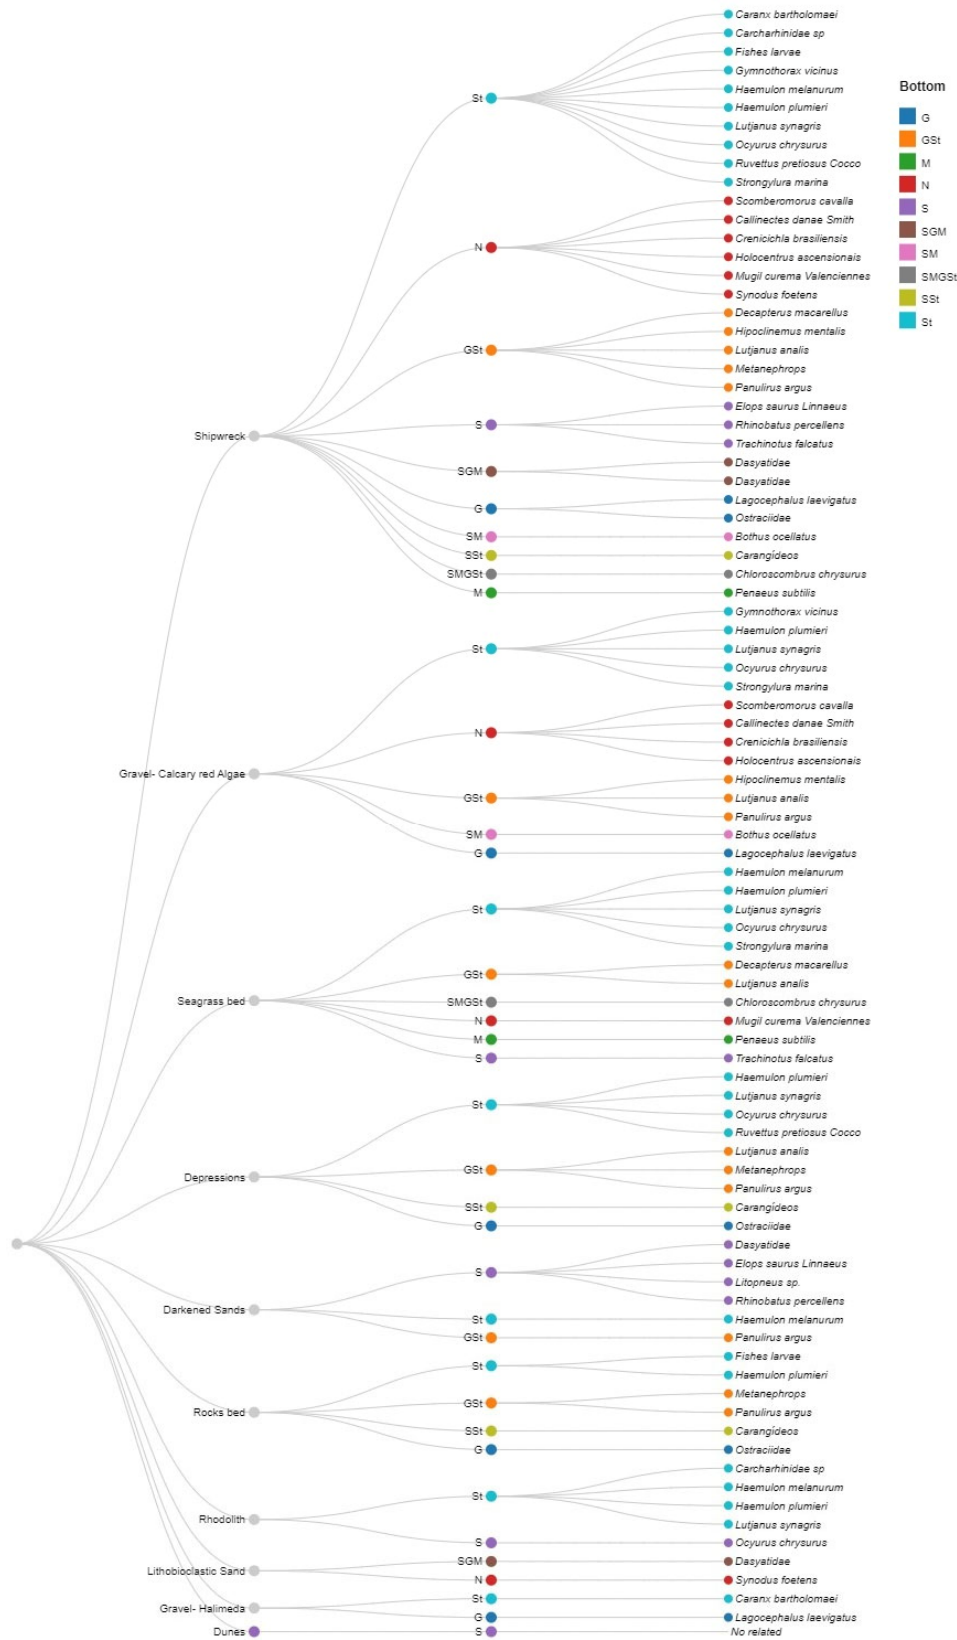

**Figure S1:** Bottom types and associated species in seascapes used for fishing. Source: Seascape by ethnogeomorphology mapping, Bottom types: St = Stone, G = Gravel, S = Sand, M = Mud, N = Nekton organisms [56,57], c) fish species (Participatory Mapping).
